# Supplementary material for: Structural determination of Zn2+, Cu2+, and Fe2+ complexed with glutathione by IRMPD spectroscopy and complimentary ab initio calculations
Source: Royal Society of Chemistry journal article supplement (doi:10.1039/d4cp03848g), 2024-01-01
Supplement: d4cp03848g1.pdf [file d4cp03848g1.pdf]

## Supplementary Information

### Structural Determination of Fe<sup>2+</sup>, Cu<sup>2+</sup>, and Zn<sup>2+</sup> Complexed with Glutathione by IRMPD

#### Spectroscopy and Complimentary *ab Initio* Calculations

Samantha K. Walker,<sup>1,†</sup> Amanda R. Bubas,<sup>1,‡,§</sup> Brandon C. Stevenson,<sup>1</sup> Evan H. Perez,<sup>1</sup> Giel Berden,<sup>2</sup>  
Jonathan Martens,<sup>2</sup> Jos Oomens,<sup>2,3</sup> and P. B. Armentrout<sup>1\*</sup>

<sup>1</sup>Department of Chemistry, University of Utah, Salt Lake City, UT 84112-0850 USA

<sup>2</sup>Radboud University, Institute for Molecules and Materials, FELIX Laboratory, Toernooiveld 7, 6525 ED  
Nijmegen, The Netherlands

<sup>3</sup>van't Hoff Institute for Molecular Sciences, University of Amsterdam, Science Park 904, 1098 XH  
Amsterdam, The Netherlands

<sup>†</sup>These authors contributed equally as co-first authors.

<sup>‡</sup>Present address: Pacific Northwest National Laboratory, Richland, WA 99352.

Contents:

Table S1. Products monitored for FELIX experiments

Table S2. Structures not listed in main text

Table S3 – S5. Relative Enthalpies at 0 K (Gibbs Energies at 298 K) of M(GSH-H)<sup>+</sup> in kJ/mol

Table S6 – S8. Experimental vibrations for M(GSH-H)<sup>+</sup> and corresponding calculated motions at the MP2/6-311+G(d,p)

Figures S1 – S3. Full experimental spectra for FELIX experiments

Figures S4 – S6. Comparison of the M(GSH-H)<sup>+</sup> experimental IRMPD spectrum (solid black line) with calculated spectra to wavenumbers lower than experimentally collected.

Figures S7 – S9. Comparison of the M(GSH-H)<sup>+</sup> experimental IRMPD spectrum (solid black line) with spectra calculated at several levels of theory.

Table S1. Mass-to-charge ratios for the products monitored for FELIX experiments

| <b>Fe(GSH-H)<sup>+</sup></b> |       | <b>Cu(GSH-H)<sup>+</sup></b> | <b>Zn(GSH-H)<sup>+</sup></b> |       |
|------------------------------|-------|------------------------------|------------------------------|-------|
| <b>m/z</b>                   |       | <b>m/z</b>                   | <b>m/z</b>                   |       |
| 361.9                        | 214.6 | 368.9                        | 369.9                        | 220.6 |
| 344.8                        | 212.6 | 367.9                        | 367.9                        | 212.6 |
| 343.9                        | 208.6 | 366.9                        | 361.4                        | 205.6 |
| 325.9                        | 206.6 | 351.9                        | 351.9                        | 204.6 |
| 317.9                        | 204.6 | 341.8                        | 349.9                        | 203.6 |
| 315.9                        | 198.6 | 338.4                        | 332.4                        | 202.6 |
| 309.8                        | 197.6 | 332.4                        | 323.9                        | 194.6 |
| 300.8                        | 196.6 | 330.8                        | 306.8                        | 193.6 |
| 299.8                        | 189.6 | 325.8                        | 305.8                        | 184.7 |
| 298.8                        | 188.6 | 324.9                        | 300.7                        | 180.6 |
| 297.8                        | 187.6 | 323.9                        | 298.7                        | 175.6 |
| 286.8                        | 186.6 | 322.9                        | 296.8                        | 155.6 |
| 283.8                        | 184.6 | 321.9                        | 295.8                        | 151.6 |
| 282.8                        | 173.5 | 308.8                        | 294.8                        | 140.7 |
| 272.7                        | 172.6 | 306.8                        | 289.8                        | 139.7 |
| 271.8                        | 171.6 | 305.9                        | 287.8                        | 138.7 |
| 270.7                        | 170.6 | 304.8                        | 280.7                        | 137.6 |
| 269.7                        | 169.6 | 294.8                        | 279.7                        | 129.8 |
| 258.7                        | 160.6 | 293.8                        | 278.7                        | 123.8 |
| 255.8                        | 157.6 | 278.8                        | 277.8                        |       |
| 254.7                        | 155.6 | 267.7                        | 276.7                        |       |
| 253.7                        | 147.6 | 266.7                        | 268.7                        |       |
| 252.7                        | 143.6 | 265.7                        | 267.7                        |       |
| 251.7                        | 141.6 | 260.7                        | 266.7                        |       |
| 250.7                        | 139.7 | 250.7                        | 260.7                        |       |
| 243.7                        | 129.7 | 242.7                        | 259.7                        |       |
| 242.7                        |       | 235.6                        | 250.7                        |       |
| 240.7                        |       | 230.7                        | 248.7                        |       |
| 235.6                        |       | 222.6                        | 243.7                        |       |
| 233.6                        |       | 192.6                        | 240.7                        |       |
| 232.6                        |       | 176.7                        | 238.7                        |       |
| 230.6                        |       | 152.8                        | 232.7                        |       |
| 226.7                        |       | 148.7                        | 230.7                        |       |
| 225.7                        |       | 129.8                        | 223.6                        |       |
| 224.6                        |       |                              | 222.6                        |       |
| 215.6                        |       |                              | 221.6                        |       |

Table S2. Additional structures not listed in main text. Relative energies ( $E_{\text{rel}}$  in kJ/mol) are 298 K Gibbs energies at the level of theory indicated. Calculated energies, zero-point energies (ZPE), and 298 K thermal corrections (TC) are listed in Hartree. Frequencies scaled (sc) by 0.9896. Structures in bold are included in Tables in the main text and are usually the lowest energy structure of a particular binding motif. The designation of the metal binding site is followed by the amino acid orientation, which is represented by characterization of dihedral angles along the peptide backbone as cis (c, for angles between  $0^\circ$ – $45^\circ$ ), gauche (g,  $45^\circ$ – $135^\circ$ ), or trans (t,  $135^\circ$ – $180^\circ$ ). Dihedrals are measured from the nitrogen atom of the N-terminus to the C-terminus ending with the carboxylic acid hydrogen.

| <b>Zn(GSH-H)<sup>+</sup></b>                                                                       | $E_{\text{rel}}$ | B3LYP/              |                 |                 |                 |                 |
|----------------------------------------------------------------------------------------------------|------------------|---------------------|-----------------|-----------------|-----------------|-----------------|
| Binding Motif                                                                                      | kJ/mol           | 6-311+G(d,p)        | ZPE             | TC              | ZPE(sc)         | TC(sc)          |
| <b>[N<sup>1</sup>, CO<sup>γ</sup>, S<sup>-</sup>, CO<sup>3</sup>]-ggttcgtgtt</b>                   | <b>0.4</b>       | <b>-3184.093343</b> | <b>0.286782</b> | <b>0.23597</b>  | <b>0.283799</b> | <b>0.232792</b> |
| <b>[N<sup>1</sup>, CO<sup>1</sup>, CO<sup>γ</sup>, CO<sup>3</sup>]-gggtgttgt</b>                   | <b>7.8</b>       | <b>-3184.088693</b> | <b>0.284194</b> | <b>0.234144</b> | <b>0.281239</b> | <b>0.230995</b> |
| <b>[CO<sup>1</sup>, CO<sup>γ</sup>, S<sup>-</sup>, CO<sup>3</sup>]-gggtcgtgtt</b>                  | <b>6.4</b>       | <b>-3184.090269</b> | <b>0.286024</b> | <b>0.235208</b> | <b>0.28305</b>  | <b>0.232037</b> |
| <b>[N<sup>1</sup>, CO<sup>γ</sup>, N<sup>2</sup>H, S<sup>-</sup>]-gggtgttttt</b>                   | <b>0.0</b>       | <b>-3184.0905</b>   | <b>0.286507</b> | <b>0.232994</b> | <b>0.283527</b> | <b>0.229814</b> |
| [N <sup>1</sup> , N <sup>2</sup> H, S <sup>-</sup> , CO <sup>2</sup> ]-gggtgttttt                  | 2.3              | -3184.088867        | 0.286277        | 0.232241        | 0.2833          | 0.229062        |
| [N <sup>1</sup> , CO <sup>1-</sup> , N <sup>2</sup> , SH, CO <sup>3</sup> ]-ggctgctgtt             | 20.5             | -3184.08097         | 0.285745        | 0.231278        | 0.282773        | 0.228103        |
| [CO <sup>1</sup> , S <sup>-</sup> , CO <sup>2</sup> , CO <sup>3</sup> ]-gggtgttgtt                 | 23.5             | -3184.084269        | 0.285899        | 0.235718        | 0.282925        | 0.232549        |
| [N <sup>1</sup> , N <sup>2</sup> , S <sup>-</sup> , CO <sup>3</sup> ]-ggctgctgtt                   | 26.3             | -3184.080177        | 0.28618         | 0.232698        | 0.283204        | 0.229521        |
| [N <sup>1</sup> , CO <sup>1</sup> , N <sup>2</sup> , S <sup>-</sup> , CO <sup>2</sup> ]-ggctgttttt | 32.6             | -3184.076719        | 0.285333        | 0.231614        | 0.282366        | 0.228443        |
| [N <sup>1</sup> , N <sup>2</sup> , S <sup>-</sup> , N <sup>3</sup> , CO <sup>3</sup> ]-ggctgctttt  | 38.1             | -3184.076022        | 0.285362        | 0.232997        | 0.282394        | 0.229834        |
| [N <sup>1</sup> , N <sup>2</sup> , S <sup>-</sup> , CO <sup>3</sup> ]-ggcttctgtt                   | 52.3             | -3184.071583        | 0.285871        | 0.234007        | 0.282898        | 0.230834        |
| [N <sup>1</sup> , N <sup>2</sup> , S <sup>-</sup> , CO <sup>3</sup> ]-ggctgctgtt                   | 54.7             | -3184.070631        | 0.28594         | 0.233939        | 0.282967        | 0.230766        |
| [N <sup>1</sup> , CO <sup>1-</sup> , N <sup>2</sup> , SH, CO <sup>3</sup> ]-ggctgctgtt             | 54.8             | -3184.069865        | 0.283321        | 0.233181        | 0.280374        | 0.230038        |
| [N <sup>1</sup> , N <sup>2</sup> , S <sup>-</sup> , N <sup>3</sup> , CO <sup>3</sup> ]-ggctgctttt  | 57.7             | -3184.068296        | 0.285166        | 0.232769        | 0.2822          | 0.229601        |
| <b>Cu(GSH-H)<sup>+</sup></b>                                                                       |                  |                     |                 |                 |                 |                 |
| Binding Motif                                                                                      | $E_{\text{rel}}$ | B3LYP/              |                 |                 |                 |                 |
|                                                                                                    | kJ/mol           | 6-311+G(d,p)        | ZPE             | TC              | ZPE(sc)         | TC(sc)          |
| <b>[N<sup>1</sup>, CO<sup>1</sup>, N<sup>2</sup>H, S<sup>-</sup>]-ggttttttt</b>                    | <b>0.0</b>       | <b>-3045.229718</b> | <b>0.285842</b> | <b>0.230838</b> | <b>0.282869</b> | <b>0.227662</b> |
| <b>[N<sup>1</sup>, S<sup>-</sup>, CO<sup>2</sup>]-gggtcgtttt</b>                                   | <b>20.5</b>      | <b>-3045.222133</b> | <b>0.285647</b> | <b>0.231069</b> | <b>0.282677</b> | <b>0.227895</b> |
| <b>[N<sup>1</sup>, CO<sup>γ</sup>, S<sup>-</sup>, CO<sup>3</sup>]-ggttcgtgtt</b>                   | <b>54.9</b>      | <b>-3045.213215</b> | <b>0.286349</b> | <b>0.23526</b>  | <b>0.283371</b> | <b>0.232087</b> |

|                                                                                                                     |                        |                     |                 |                 |                 |                 |
|---------------------------------------------------------------------------------------------------------------------|------------------------|---------------------|-----------------|-----------------|-----------------|-----------------|
| <b>[N<sup>1</sup>, CO<sup>1</sup>, N<sup>2</sup>, S<sup>-</sup>, CO<sup>2</sup>]-gggtttttt</b>                      | <b>52.6</b>            | <b>-3045.209712</b> | <b>0.285341</b> | <b>0.230849</b> | <b>0.282374</b> | <b>0.227678</b> |
| [N <sup>1</sup> , CO <sup>γ</sup> , S <sup>-</sup> ]-gggtttttt                                                      | 25.4                   | -3045.219712        | 0.285498        | 0.23051         | 0.282529        | 0.227337        |
| [CO <sup>1</sup> , CO <sup>γ</sup> , S <sup>-</sup> , CO <sup>3</sup> ]-gggtcgtgtt                                  | 55.8                   | -3045.210295        | 0.284871        | 0.23264         | 0.281908        | 0.229475        |
| [CO <sup>1</sup> , S <sup>-</sup> , CO <sup>2</sup> , CO <sup>3</sup> ]-gggtgttgtt                                  | 59.3                   | -3045.20866         | 0.284585        | 0.23235         | 0.281626        | 0.229188        |
| [N <sup>1</sup> , CO <sup>1</sup> , CO <sup>γ</sup> , CO <sub>2</sub> <sup>-</sup> ]-gggtgttgtt                     | 73.0                   | -3045.204958        | 0.284035        | 0.233835        | 0.281081        | 0.230688        |
| [N <sup>1</sup> , CO <sup>1</sup> , S <sup>-</sup> , CO <sup>3</sup> ]-gggttctgtt                                   | 86.2                   | -3045.198843        | 0.2853          | 0.232781        | 0.282333        | 0.229612        |
| [N <sup>1</sup> , CO <sup>1</sup> , S <sup>-</sup> , CO <sup>3</sup> ]-gggttctgtt                                   | 86.5                   | -3045.199334        | 0.28545         | 0.233379        | 0.282481        | 0.23021         |
| [N <sup>1</sup> , CO <sup>1-</sup> , SH, N <sup>3</sup> , CO <sup>3</sup> ]-gggttgtttt                              | 98.4                   | -3045.193545        | 0.28299         | 0.232091        | 0.280047        | 0.228951        |
| [N <sup>1</sup> , CO <sup>1</sup> , S <sup>-</sup> , N <sup>3</sup> , CO <sup>3</sup> ]-gggttctttt                  | 98.9                   | -3045.193209        | 0.284638        | 0.23197         | 0.281678        | 0.228807        |
| [N <sup>1</sup> , CO <sup>1</sup> , S <sup>-</sup> , N <sup>3</sup> , CO <sup>3</sup> ]-gggttctttt                  | 105.1                  | -3045.190896        | 0.284618        | 0.232032        | 0.281658        | 0.228869        |
| [N <sup>1</sup> , CO <sup>1</sup> , N <sup>2</sup> , S <sup>-</sup> , N <sup>3</sup> , CO <sup>3</sup> ]-gggttctttt | 105.1                  | -3045.190896        | 0.284618        | 0.232032        | 0.281658        | 0.228869        |
| [N <sup>1</sup> , CO <sup>1</sup> , N <sup>3</sup> ]-ggctgctttt                                                     | 116.5                  | -3045.185047        | 0.282081        | 0.230484        | 0.279147        | 0.227351        |
| [N <sup>1</sup> , CO <sup>1-</sup> , SH, N <sup>3</sup> ]-ggctgctttt                                                | 120.1                  | -3045.183513        | 0.282069        | 0.230344        | 0.279135        | 0.227211        |
| <b>Fe(GSH-H)<sup>+</sup>-Triplet</b>                                                                                | <b>E<sub>rel</sub></b> | <b>B3LYP/</b>       | <b>ZPE</b>      | <b>TC</b>       | <b>ZPE(sc)</b>  | <b>TC(sc)</b>   |
| <b>Binding Motif</b>                                                                                                | <b>kJ/mol</b>          | <b>6-311+G(d,p)</b> |                 |                 |                 |                 |
| <b>[N<sup>1</sup>, CO<sup>γ</sup>, S<sup>-</sup>, NH, CO<sup>3</sup>]-ggttcgtgtt</b>                                | <b>0.0</b>             | <b>-2668.441313</b> | <b>0.287347</b> | <b>0.237129</b> | <b>0.284359</b> | <b>0.233952</b> |
| <b>[N<sup>1</sup>, CO<sup>1</sup>, N<sup>2</sup>, S<sup>-</sup>, CO<sup>2</sup>]-gggtttttt</b>                      | <b>3.0</b>             | <b>-2668.437018</b> | <b>0.286477</b> | <b>0.233971</b> | <b>0.283498</b> | <b>0.230797</b> |
| <b>[CO<sup>1</sup>, CO<sup>γ</sup>, S<sup>-</sup>, CO<sup>3</sup>]-gggtcgtgtt</b>                                   | <b>15.4</b>            | <b>-2668.435036</b> | <b>0.28656</b>  | <b>0.236692</b> | <b>0.28358</b>  | <b>0.233522</b> |
| <b>[N<sup>1</sup>, CO<sup>1</sup>, CO<sup>γ</sup>, CO<sup>3-</sup>]-gggtgttgtt</b>                                  | <b>16.3</b>            | <b>-2668.432841</b> | <b>0.284843</b> | <b>0.234837</b> | <b>0.28188</b>  | <b>0.231686</b> |
| [N <sup>1</sup> , CO <sup>1</sup> , N <sup>2</sup> , SH, CO <sup>3</sup> ]-ggctgctgtt                               | 22.9                   | -2668.428562        | 0.283956        | 0.233057        | 0.281002        | 0.229913        |
| [N <sup>1</sup> , CO <sup>1-</sup> , SH, N <sup>3</sup> , CO <sup>3</sup> ]-gggttgtttt                              | 26.8                   | -2668.428204        | 0.284121        | 0.23418         | 0.281166        | 0.231034        |
| [N <sup>1</sup> , CO <sup>1</sup> , N <sup>2</sup> , S <sup>-</sup> , N <sup>3</sup> , CO <sup>3</sup> ]-gggttctttt | 39.0                   | -2668.424043        | 0.285694        | 0.234688        | 0.282722        | 0.231521        |
| [N <sup>1</sup> , CO <sup>1-</sup> , N <sup>2</sup> , N <sup>3</sup> ]-ggctgctttt                                   | 38.6                   | -2668.421736        | 0.283043        | 0.232202        | 0.280099        | 0.229064        |
| [N <sup>1</sup> , CO <sup>1</sup> , N <sup>2</sup> , S <sup>-</sup> , N <sup>3</sup> , CO <sup>3</sup> ]-gggttctttt | 46.7                   | -2668.421043        | 0.285657        | 0.23464         | 0.282686        | 0.231473        |

|                                                                                                                     |      |              |          |          |          |          |
|---------------------------------------------------------------------------------------------------------------------|------|--------------|----------|----------|----------|----------|
| [N <sup>1</sup> , CO <sup>1</sup> , N <sup>2</sup> , S <sup>-</sup> , N <sup>3</sup> , CO <sup>3</sup> ]-gggttctttt | 46.7 | -2668.421043 | 0.285657 | 0.234639 | 0.282686 | 0.231473 |
| [N <sup>1</sup> , CO <sup>1-</sup> , N <sup>2</sup> , N <sup>3</sup> ]-ggctgctttt                                   | 41.6 | -2668.420544 | 0.283077 | 0.232174 | 0.280133 | 0.229036 |
| [N <sup>1</sup> , CO <sup>1</sup> , N <sup>2</sup> , S <sup>-</sup> , CO <sup>3</sup> ]-gggttctgtt                  | 52.3 | -2668.41926  | 0.286206 | 0.234989 | 0.283229 | 0.231817 |
| [N <sup>1</sup> , N <sup>2</sup> , S <sup>-</sup> , N <sup>3</sup> H, CO <sup>3</sup> ]-ggctgctgtt                  | 69.2 | -2668.411784 | 0.285707 | 0.233948 | 0.282736 | 0.230783 |
| [CO <sup>1</sup> , S <sup>-</sup> , CO <sup>2</sup> , CO <sup>3</sup> ]-gggtgtgtt                                   | 73.4 | -2668.410353 | 0.28562  | 0.234107 | 0.28265  | 0.23094  |

| <b>Fe(GSH-H)<sup>+</sup>-Quintet</b><br>Binding Motif                                               | E <sub>rel</sub><br>kJ/mol | B3LYP/<br>6-311+G(d,p) | ZPE             | TC              | ZPE(sc)         | TC(sc)          |
|-----------------------------------------------------------------------------------------------------|----------------------------|------------------------|-----------------|-----------------|-----------------|-----------------|
| <b>[CO<sup>1</sup>, S<sup>-</sup>, CO<sup>2</sup>, CO<sup>3</sup>]-gggtgtgtt</b>                    | <b>34.8</b>                | <b>-2668.462488</b>    | <b>0.285587</b> | <b>0.233548</b> | <b>0.282617</b> | <b>0.230381</b> |
| <b>[CO<sup>1</sup>, CO<sup>γ</sup>, S<sup>-</sup>, CO<sup>3</sup>]-gggtcgtgtt</b>                   | <b>12.4</b>                | <b>-2668.470776</b>    | <b>0.285808</b> | <b>0.233329</b> | <b>0.282835</b> | <b>0.230159</b> |
| <b>[N<sup>1</sup>, CO<sup>1</sup>, N<sup>2</sup>, S<sup>-</sup>, CO<sup>2</sup>]-ggctttttt</b>      | <b>37.7</b>                | <b>-2668.458361</b>    | <b>0.285407</b> | <b>0.230525</b> | <b>0.282439</b> | <b>0.227354</b> |
| <b>[N<sup>1</sup>, N<sup>2</sup>H, S<sup>-</sup>, CO<sup>2</sup>]-gggtgtttt</b>                     | <b>34.1</b>                | <b>-2668.459567</b>    | <b>0.285997</b> | <b>0.230385</b> | <b>0.283022</b> | <b>0.227209</b> |
| [N <sup>1</sup> , CO <sup>1</sup> , CO <sup>γ</sup> , CO <sup>3-</sup> ]-gggtgtgtt                  | 0.0                        | -2668.474078           | 0.283848        | 0.231874        | 0.280896        | 0.228727        |
| [N <sup>1</sup> , CO <sup>1</sup> , N <sup>2</sup> H, S <sup>-</sup> ]-gggtgtttt                    | 44.7                       | -2668.456068           | 0.286103        | 0.23093         | 0.283128        | 0.227754        |
| [CO <sup>1</sup> , S <sup>-</sup> , CO <sup>2</sup> , CO <sup>3</sup> ]-gggtgtgtt                   | 58.6                       | -2668.45244            | 0.284988        | 0.232563        | 0.282024        | 0.229398        |
| [N <sup>1</sup> , CO <sup>1</sup> , N <sup>2</sup> , CO <sup>3</sup> ]-ggctgctgtt                   | 61.9                       | -2668.448902           | 0.282646        | 0.23025         | 0.279706        | 0.227113        |
| [N <sup>1</sup> , CO <sup>1-</sup> , N <sup>2</sup> , N <sup>3</sup> , CO <sup>3</sup> ]-gggttctttt | 63.5                       | -2668.445588           | 0.281325        | 0.227552        | 0.2784          | 0.224423        |
| [N <sup>1</sup> , CO <sup>1-</sup> , N <sup>3</sup> , CO <sup>3</sup> ]-gggttctttt                  | 67.0                       | -2668.444195           | 0.281376        | 0.227488        | 0.27845         | 0.224358        |
| [N <sup>1</sup> , N <sup>2</sup> , S <sup>-</sup> , N <sup>3</sup> , CO <sup>3</sup> ]-gggtgctttt   | 68.5                       | -2668.446749           | 0.284611        | 0.230648        | 0.281651        | 0.227485        |
| [N <sup>1</sup> , CO <sup>1</sup> , N <sup>2</sup> , S <sup>-</sup> , CO <sup>3</sup> ]-gggtcgtgtt  | 69.5                       | -2668.448241           | 0.285313        | 0.232544        | 0.282346        | 0.229377        |
| [N <sup>1</sup> , N <sup>2</sup> , S <sup>-</sup> , CO <sup>3</sup> ]-gggttctgtt                    | 69.8                       | -2668.448573           | 0.285343        | 0.232978        | 0.282376        | 0.229813        |
| [N <sup>1</sup> , CO <sup>1</sup> , N <sup>2</sup> H, S <sup>-</sup> ]-gggtgtttt                    | 70.5                       | -2668.44605            | 0.285805        | 0.230716        | 0.282833        | 0.227542        |

Table S3. Relative Enthalpies at 0 K (Gibbs Energies at 298 K) of Zn(GSH-H)<sup>+</sup> in kJ/mol

| Structure                                                                                             | B3LYP//<br>B3LYP | B3LYP//<br>MP2 | B3LYP-GD3BJ//<br>B3LYP-GD3BJ | $\omega$ B97XD//<br>B3LYP | $\omega$ B97XD//<br>MP2 | MP2(full)//<br>B3LYP | MP2(full)//<br>MP2 |
|-------------------------------------------------------------------------------------------------------|------------------|----------------|------------------------------|---------------------------|-------------------------|----------------------|--------------------|
| [N <sup>1</sup> , CO <sup><math>\gamma</math></sup> , S <sup>-</sup> , CO <sup>3-</sup> ]-ggttcgtgtt  | 0.0 (0.0)        | 0.0 (0.7)      | 0.0 (0.0)                    | 0.0 (0.0)                 | 0.0 (0.0)               | 0.0 (0.0)            | 0.0 (0.0)          |
| [N <sup>1</sup> , CO <sup>1</sup> , CO <sup><math>\gamma</math></sup> , CO <sup>3-</sup> ]-gggtgttgt  | 2.3 (4.3)        | 2.4 (7.1)      | 1.8 (4.9)                    | 4.2 (6.2)                 | 3.9 (7.8)               | 0.4 (2.4)            | 1.7 (5.7)          |
| [CO <sup>1</sup> , CO <sup><math>\gamma</math></sup> , S <sup>-</sup> , CO <sup>3-</sup> ]-gggtcgtgtt | 5.1 (5.1)        | 6.4 (7.4)      | 9.0 (9.4)                    | 7.5 (7.5)                 | 8.2 (8.4)               | 16.4 (16.4)          | 17.1 (17.4)        |
| [N <sup>1</sup> , CO <sup><math>\gamma</math></sup> , N <sup>2</sup> H, S <sup>-</sup> ]-gggtgtttt    | 7.3 (0.1)        | 5.8 (0.0)      | 23.6 (16.4)                  | 22.2 (15.1)               | 21.4 (14.8)             | 18.4 (11.3)          | 20.0 (13.4)        |

Table S4. Relative Enthalpies at 0 K (Gibbs Energies at 298 K) of Cu(GSH-H)<sup>+</sup> in kJ/mol

| Structure                                                                                            | B3LYP//<br>B3LYP | B3LYP//<br>MP2 | B3LYP-<br>GD3BJ//<br>B3LYP-<br>GD3BJ | $\omega$ B97XD//<br>B3LYP | $\omega$ B97XD//<br>MP2 | MP2(full)//<br>B3LYP | MP2(full)//<br>MP2 |
|------------------------------------------------------------------------------------------------------|------------------|----------------|--------------------------------------|---------------------------|-------------------------|----------------------|--------------------|
| [N <sup>1</sup> , CO <sup>1</sup> , N <sup>2</sup> H, S <sup>-</sup> ]-ggtttttt                      | 0.0 (0.0)        | 0.0 (0.0)      | 0.0 (0.0)                            | 0.0 (0.0)                 | 0.0 (0.0)               | 47.1 (36.8)          | 39.4 (29.9)        |
| [N <sup>1</sup> , S <sup>-</sup> , CO <sup>2-</sup> ]-gggtcgtttt                                     | 21.3 (22.4)      | 3.7 (2.8)      | 18.1 (19.8)                          | 22.3 (23.4)               | 6.9 (6.0)               | 33.9 (24.7)          | 30.7 (20.2)        |
| [N <sup>1</sup> , CO <sup><math>\gamma</math></sup> , S <sup>-</sup> , CO <sup>3-</sup> ]-ggttcgtgtt | 46.6 (56.9)      | 27.3 (36.8)    | 19.4 (30.2)                          | 22.6 (32.9)               | 4.8 (14.3)              | 0.0 (0.0)            | 0.0 (0.0)          |
| [N <sup>1</sup> , CO <sup>1</sup> , N <sup>2</sup> , S <sup>-</sup> , CO <sup>2-</sup> ]-gggtttttt   | 49.9 (51.3)      | 30.3 (31.5)    | 44.7 (47.8)                          | 45.8 (47.1)               | 25.1 (26.3)             | 30.2 (21.2)          | 28.1 (19.8)        |

Table S5. Relative Enthalpies at 0 K (Gibbs Energies at 298 K) of quintet Fe(GSH-H)<sup>+</sup> in kJ/mol

| Structure                                                                                             | B3LYP//<br>B3LYP | B3LYP//<br>MP2 | B3LYP-GD3BJ//<br>B3LYP-GD3BJ | $\omega$ B97XD//<br>B3LYP | $\omega$ B97XD//<br>MP2 | MP2(full)//<br>B3LYP | MP2(full)//<br>MP2 |
|-------------------------------------------------------------------------------------------------------|------------------|----------------|------------------------------|---------------------------|-------------------------|----------------------|--------------------|
| [CO <sup>1</sup> , S <sup>-</sup> , CO <sup>2</sup> , CO <sup>3</sup> ]-<br>gggtgttgtt                | 0.0 (0.0)        | 0.0 (0.0)      | 0.0 (0.0)                    | 0.0 (0.0)                 | 0.0 (0.0)               | 0.0 (0.0)            | 0.0 (0.0)          |
| [CO <sup>1</sup> , CO <sup>γ</sup> , S <sup>-</sup> , CO <sup>3</sup> ]-<br>gggtcgtgtt                | 9.9 (8.7)        | 12.0 (12.0)    | 19.5 (16.7)                  | 11.2 (10.0)               | 8.4 (8.4)               | 28.6 (27.4)          | 13.8 (13.9)        |
| [N <sup>1</sup> , CO <sup>1</sup> , N <sup>2</sup> , S <sup>-</sup> , CO <sup>2</sup> ]-<br>ggctttttt | 40.6 (33.2)      | 19.3 (10.6)    | 60.4 (50.2)                  | 34.9 (27.4)               | 33.0 (24.3)             | 47.6 (40.1)          | 20.0 (11.3)        |
| [N <sup>1</sup> , N <sup>2</sup> H, S <sup>-</sup> , CO <sup>2</sup> ]-<br>gggtgttttt                 | 41.3 (31.9)      | 19.0 (7.6)     | 62.9 (52.1)                  | 39.4 (30.0)               | 37.0 (25.6)             | 64.1 (54.7)          | 31.8 (20.5)        |

Table S6. Experimental vibrations for Zn(GSH-H)<sup>+</sup> and corresponding calculated motions at the MP2/6-311+G(d,p)

| Label          | Wavenumber (cm <sup>-1</sup> ) | Corresponding Motion                                                                           |
|----------------|--------------------------------|------------------------------------------------------------------------------------------------|
| v <sup>1</sup> | 1763                           | CO <sup>1</sup> stretch                                                                        |
| v <sup>2</sup> | 1688                           | CO <sup>3</sup> stretch                                                                        |
| v <sup>3</sup> | 1620                           | CO <sup>γ</sup> stretch                                                                        |
| v <sup>4</sup> | 1543                           | CN <sup>2</sup> H in-plane bend                                                                |
| v <sup>5</sup> | 1426                           | CO <sup>3</sup> H in-plane bend                                                                |
| v <sup>6</sup> | 1284                           | CH <sub>2</sub> twists                                                                         |
| v <sup>7</sup> | 1231                           | N <sup>1</sup> H <sub>2</sub> twist and CN <sup>2</sup> H and CN <sup>3</sup> H in-plane bends |
| v <sup>8</sup> | 1141                           | CO <sup>1</sup> H in-plane bend                                                                |
| v <sup>9</sup> | 1073                           | N <sup>1</sup> C stretch and CC backbone stretch                                               |

Table S7. Experimental vibrations for Cu(GSH-H)<sup>+</sup> and corresponding calculated motions at the MP2/6-311+G(d,p)

| Label           | Wavenumber (cm <sup>-1</sup> ) | Corresponding Motion                                    |
|-----------------|--------------------------------|---------------------------------------------------------|
| v <sup>'1</sup> | 1770                           | CO <sup>3</sup> stretch                                 |
| v <sup>'2</sup> | 1685                           | CO <sup>γ</sup> stretch                                 |
| v <sup>'3</sup> | 1587                           | N <sup>1</sup> H <sub>2</sub> scissor                   |
| v <sup>'4</sup> | 1505                           | CN <sup>3</sup> H in-plane bend                         |
| v <sup>'5</sup> | 1423                           | CO <sup>3</sup> H in-plane bend                         |
| v <sup>'7</sup> | 1246                           | CO <sup>3</sup> H in-plane bend and CH <sub>2</sub> wag |
| v <sup>'8</sup> | 1159                           | CO <sup>3</sup> H in-plane bend                         |
| v <sup>'9</sup> | 1102                           | N <sup>1</sup> H <sub>2</sub> wag                       |

Table S8. Experimental vibrations for Fe(GSH-H)<sup>+</sup> and corresponding calculated motions at the MP2/6-311+G(d,p)

| Label            | Wavenumber (cm <sup>-1</sup> ) | Corresponding Motion                                           |
|------------------|--------------------------------|----------------------------------------------------------------|
| v <sup>''2</sup> | 1685                           | CO <sup>γ</sup> stretch                                        |
| v <sup>''3</sup> | 1602                           | N <sup>1</sup> H <sub>2</sub> scissor                          |
| v <sup>''4</sup> | 1517                           | CN <sup>3</sup> H in-plane bend                                |
| v <sup>''5</sup> | 1425                           | CO <sup>3</sup> H in-plane bend and nearby CH <sub>2</sub> wag |
| v <sup>''6</sup> | 1263                           | CO <sup>1</sup> H in-plane bend and nearby CH bend             |
| v <sup>''7</sup> | 1219                           | Not well assigned                                              |
| v <sup>''8</sup> | 1162                           | CO <sup>3</sup> H in-plane bend                                |
| v <sup>''9</sup> | 1040                           | Not well assigned                                              |



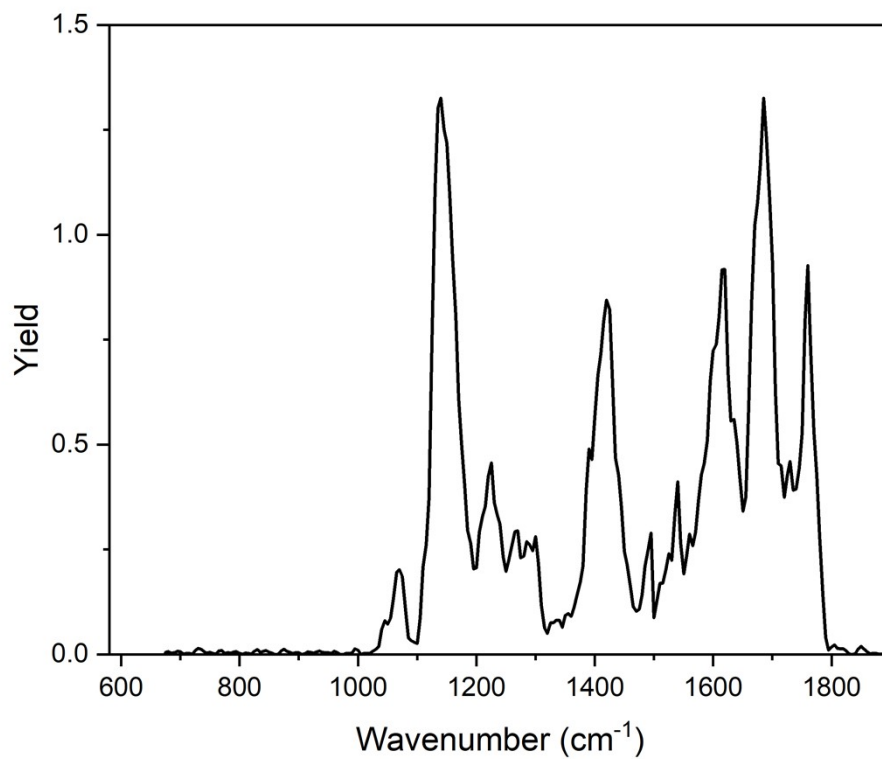

Figure S1. Zn(GSH-H)<sup>+</sup> full IRMPD experimental spectrum.

Figure S2. Cu(GSH-H)<sup>+</sup> full IRMPD experimental spectrum.

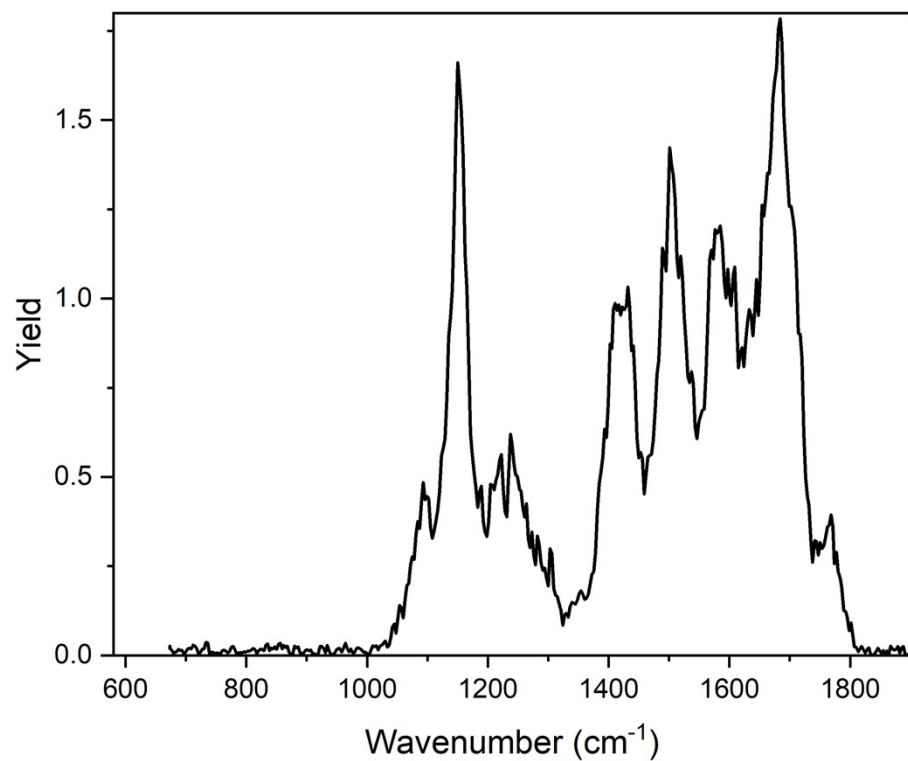

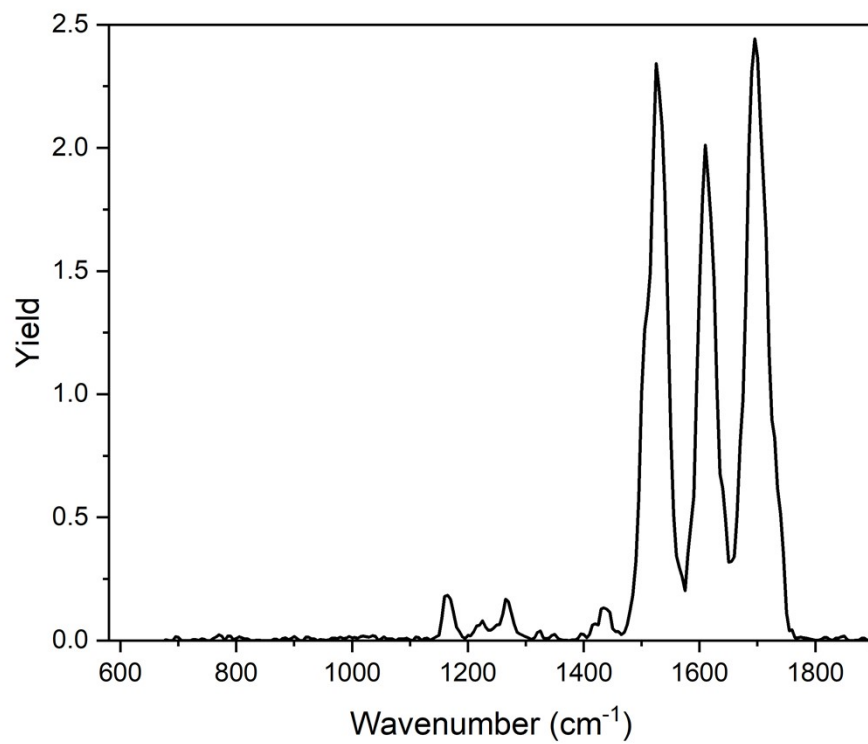

Figure S3. Fe(GSH-H)<sup>+</sup> full IRMPD experimental spectrum.

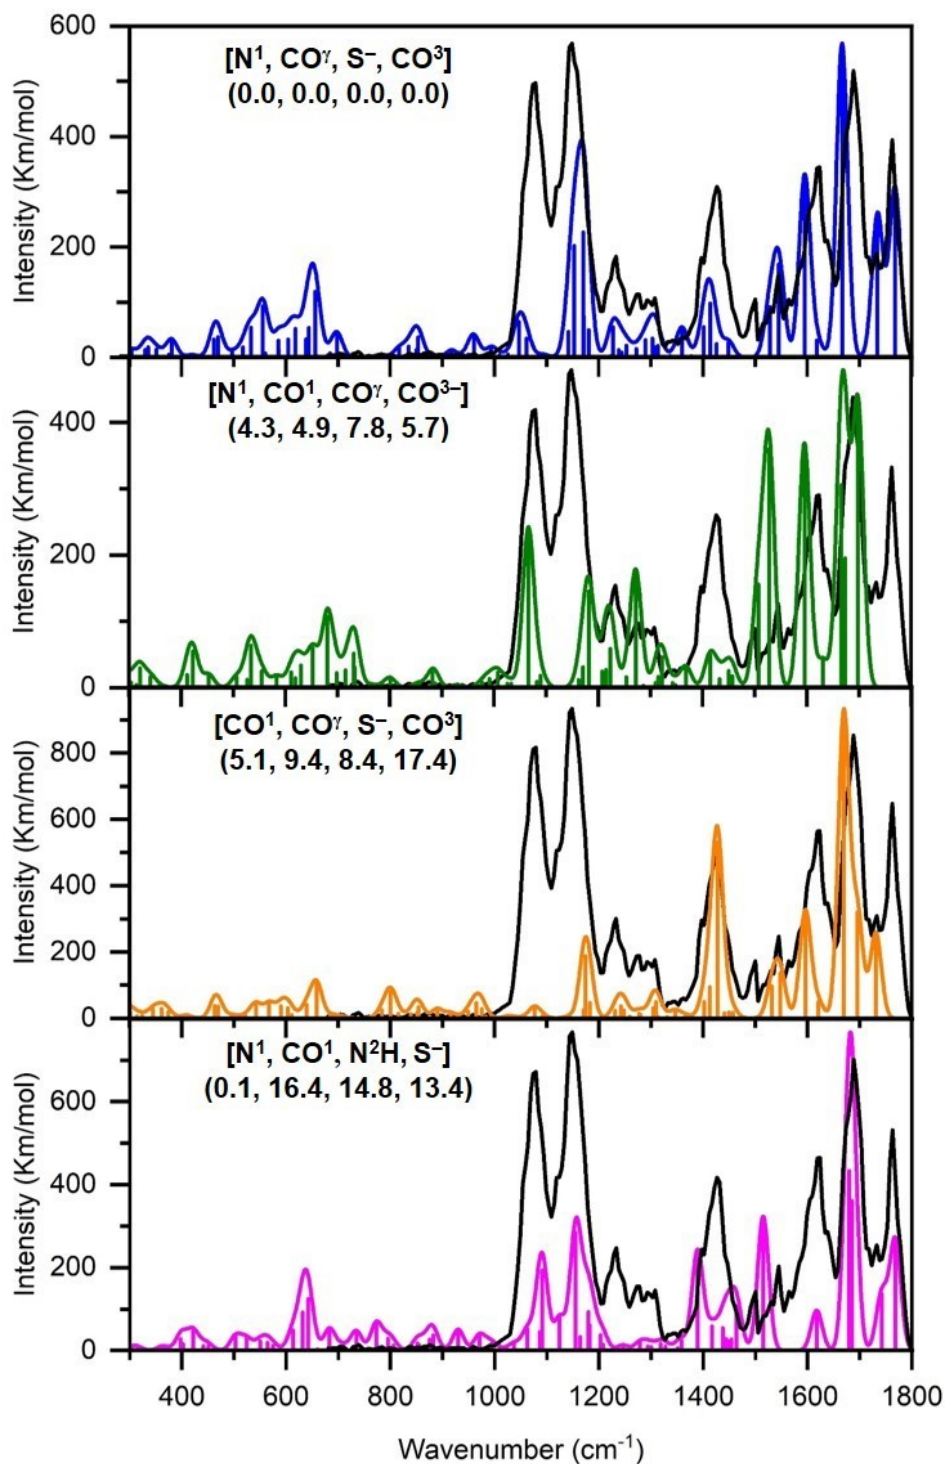

Figure S4. Comparison of the  $\text{Zn}(\text{GSH-H})^+$  experimental IRMPD spectrum (solid black line) with spectra calculated at the MP2/6-311+G(d,p) level of theory for low-lying conformers. Relative 298 K Gibbs energies (kJ/mol) are given at the B3LYP//B3LYP, B3LYP-GD3BJ//B3LYP-GD3BJ,  $\omega\text{B97XD}$ //MP2, and MP2(full)//MP2 levels, respectively, using the 6-311+G(2d,2p) basis set.

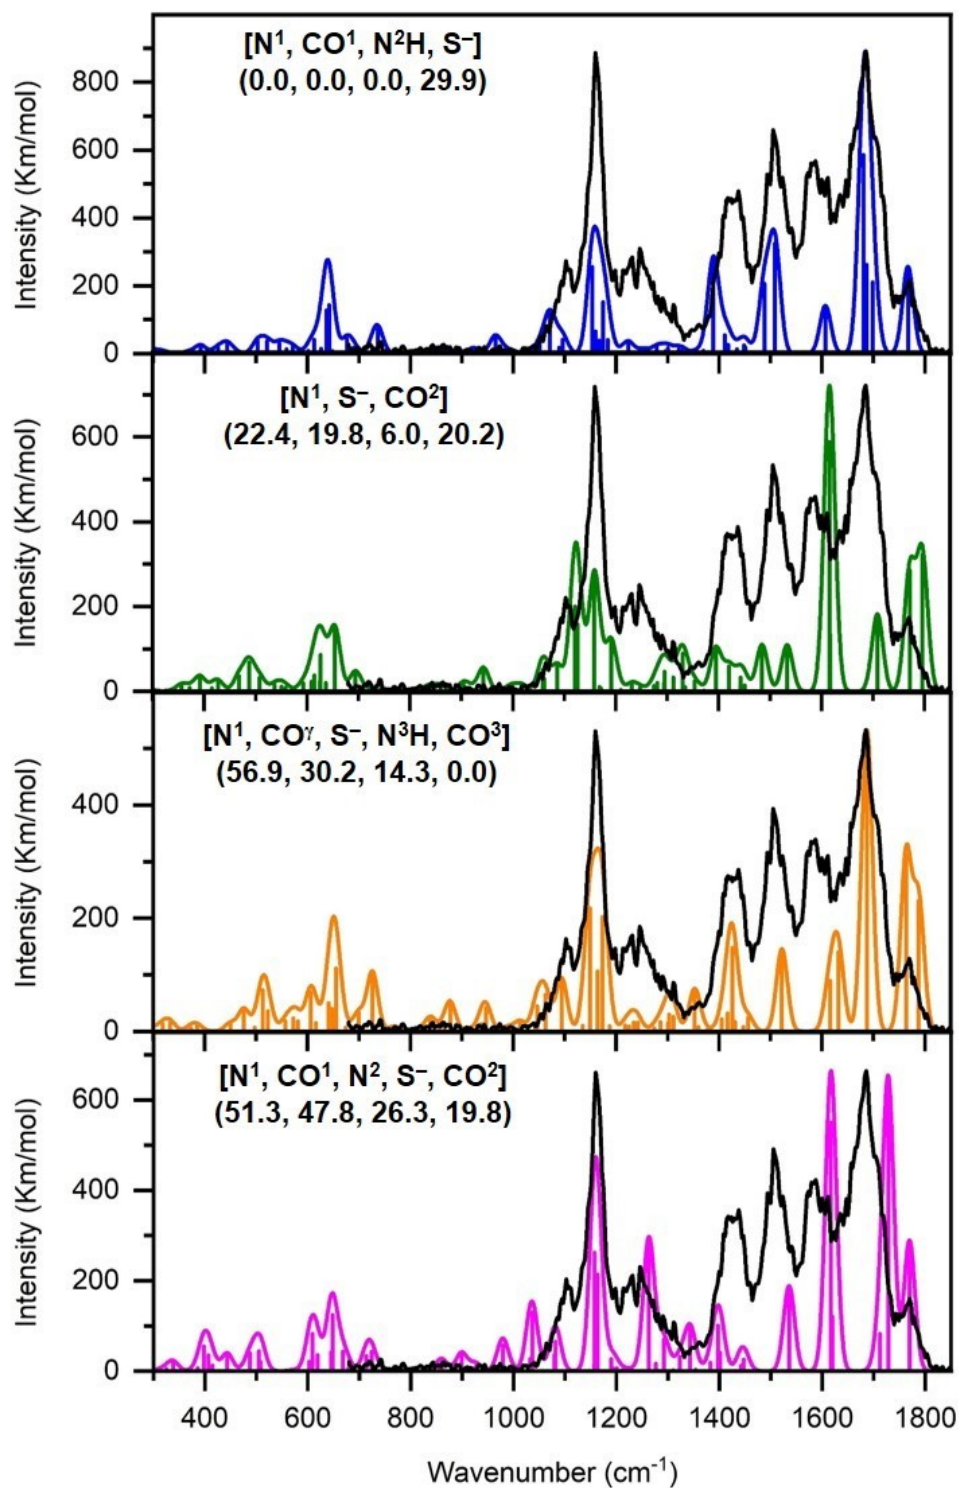

Figure S5. Comparison of the  $\text{Cu}(\text{GSH-H})^+$  experimental IRMPD spectrum (solid black line) with spectra calculated at the MP2/6-311+G(d,p) level of theory for low-lying conformers. Relative 298 K Gibbs energies (kJ/mol) are given at the B3LYP//B3LYP, B3LYP-GD3BJ//B3LYP-GD3BJ,  $\omega\text{B97XD}$ //MP2, and MP2(full)//MP2 levels, respectively, using the 6-311+G(2d,2p) basis set.

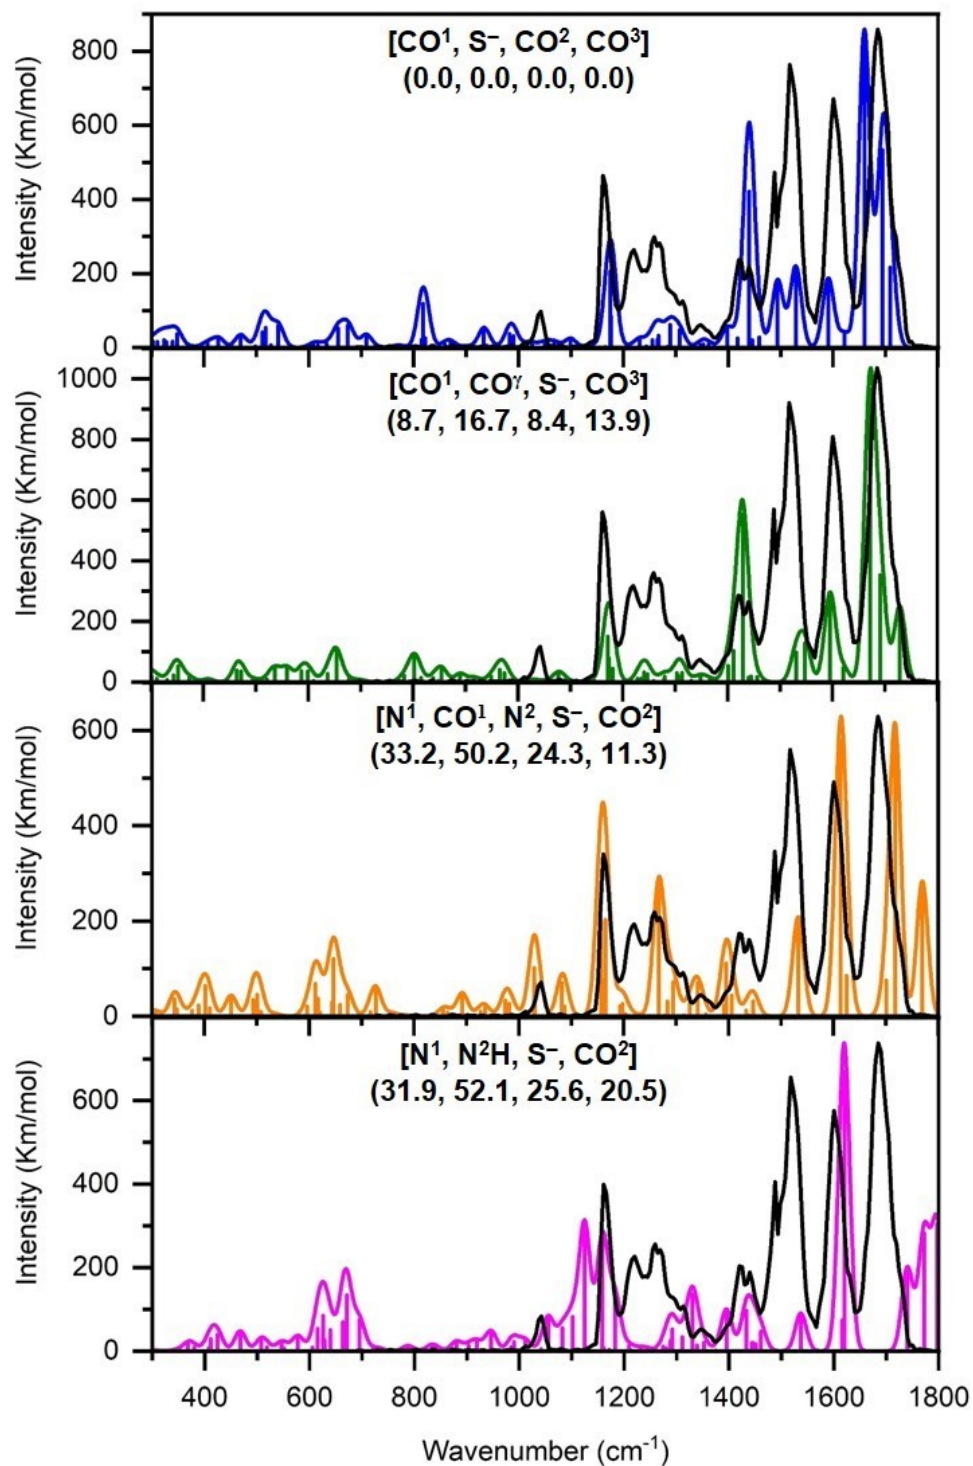

Figure

S6. Comparison of the  $\text{Fe}(\text{GSH-H})^+$  experimental IRMPD spectrum (solid black line) with spectra calculated at the MP2/6-311+G(d,p) level of theory for low-lying conformers. Relative 298 K Gibbs energies (kJ/mol) are given at the B3LYP//B3LYP, B3LYP-GD3BJ//B3LYP-GD3BJ,  $\omega$ B97XD//MP2, and MP2(full)//MP2 levels, respectively, using the 6-311+G(2d,2p) basis set.



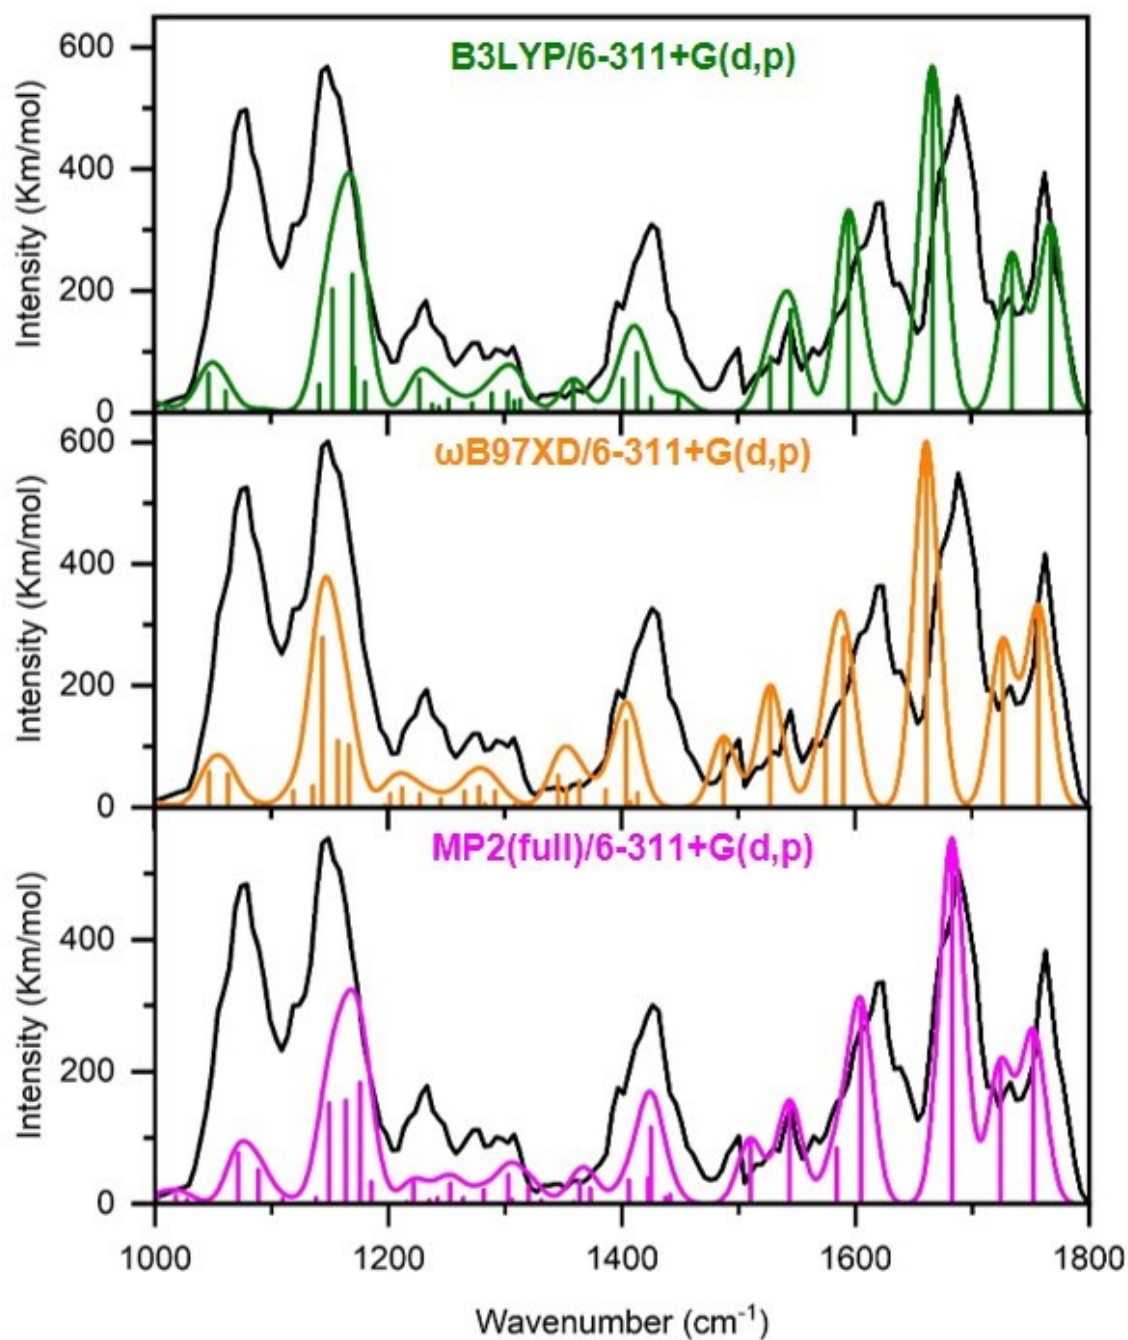

Figure S7. Comparison of the Zn(GSH-H)<sup>+</sup> experimental IRMPD spectrum (solid black line) with spectra calculated at several levels of theory for the [N<sup>1</sup>, CO<sup>γ</sup>, S<sup>-</sup>, CO<sup>3</sup>] conformer.

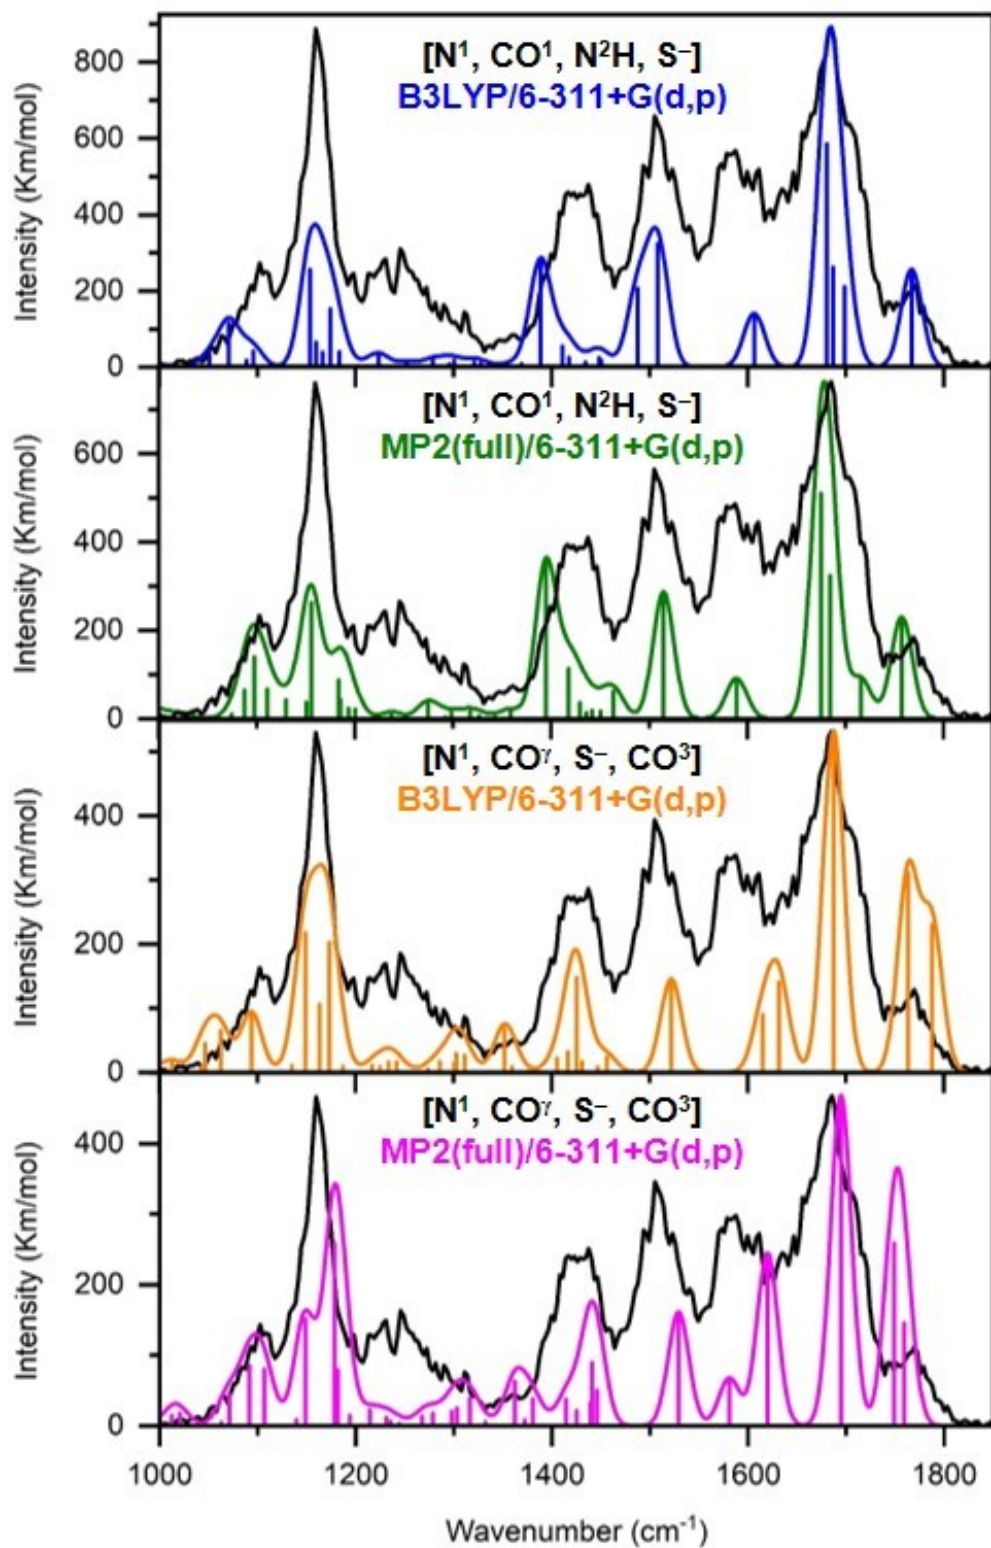

Figure S8. Comparison of the  $\text{Cu}(\text{GSH-H})^+$  experimental IRMPD spectrum (solid black line) with spectra calculated at several levels of theory.

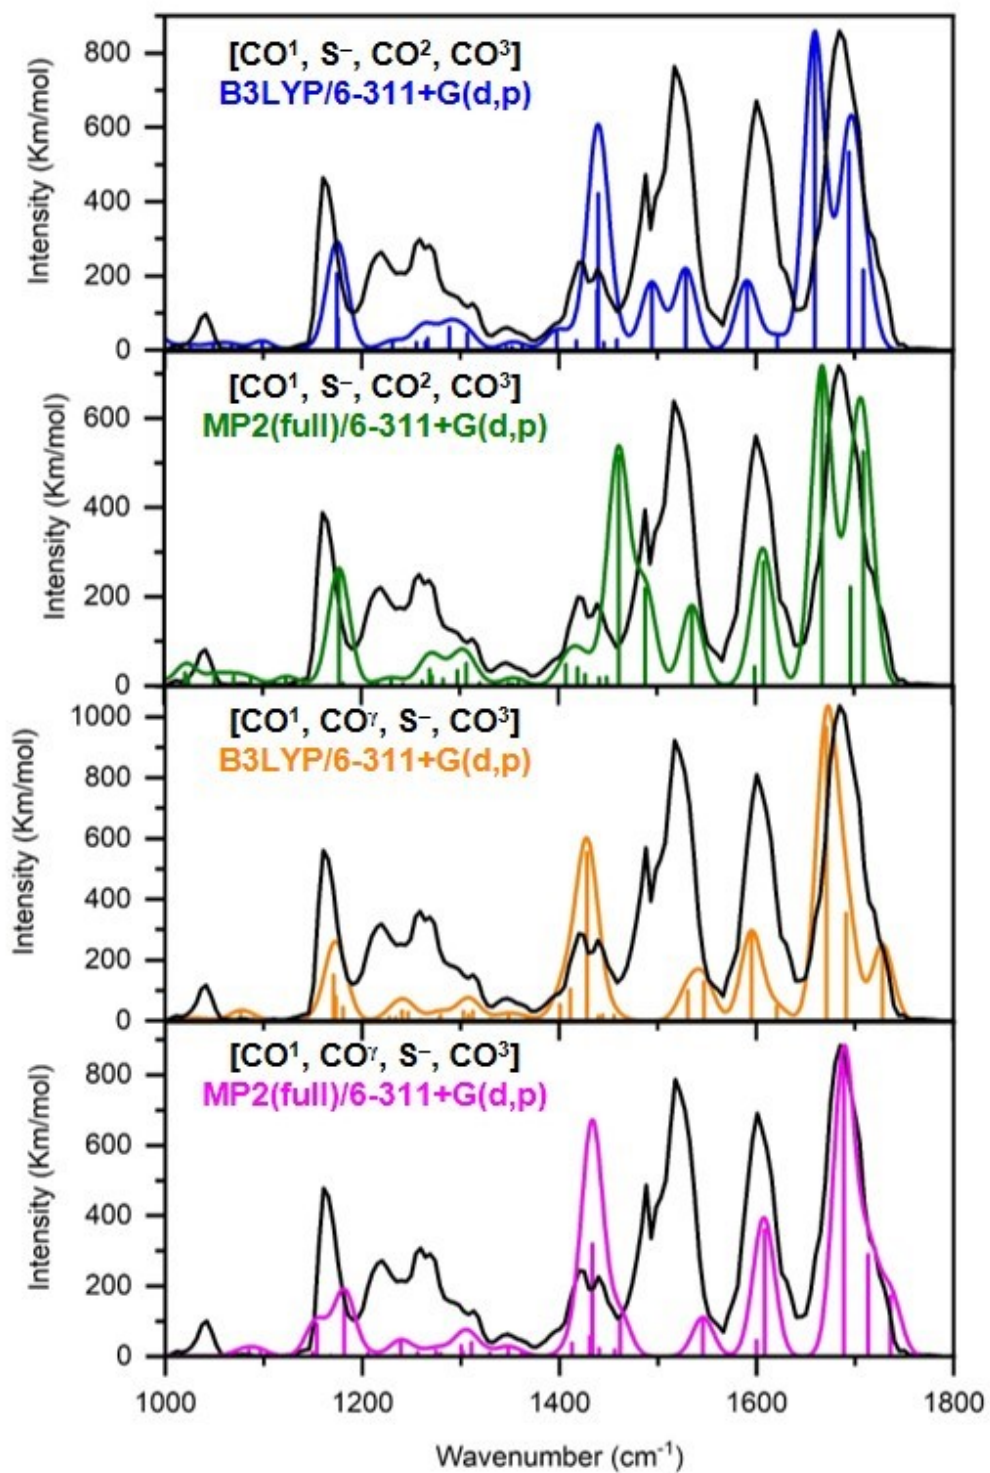

Figure S9. Comparison of the  $\text{Fe}(\text{GSH-H})^+$  experimental IRMPD spectrum (solid black line) with spectra calculated at several levels of theory.
